# Supplementary material
Source: PubMed Central journal article supplement (PMC5047805)
Supplement: supp_4.3.E496_Original_submission_2016-0049.pdf [file supp_4.3.E496_Original_submission_2016-0049.pdf]

**Housing and tuberculosis in an Inuit village in Nunavik, Québec: a case-control study**

|                               |                                                                                                                                                                                                                                                                                                                                                                                                                                                                                                                                                                                                                                                                                                                                                                                                                                                                                                                                                                                                                                                                                                                                                                                                                                        |
|-------------------------------|----------------------------------------------------------------------------------------------------------------------------------------------------------------------------------------------------------------------------------------------------------------------------------------------------------------------------------------------------------------------------------------------------------------------------------------------------------------------------------------------------------------------------------------------------------------------------------------------------------------------------------------------------------------------------------------------------------------------------------------------------------------------------------------------------------------------------------------------------------------------------------------------------------------------------------------------------------------------------------------------------------------------------------------------------------------------------------------------------------------------------------------------------------------------------------------------------------------------------------------|
| Journal:                      | <i>CMAJ</i>                                                                                                                                                                                                                                                                                                                                                                                                                                                                                                                                                                                                                                                                                                                                                                                                                                                                                                                                                                                                                                                                                                                                                                                                                            |
| Manuscript ID                 | CMAJ-15-1100                                                                                                                                                                                                                                                                                                                                                                                                                                                                                                                                                                                                                                                                                                                                                                                                                                                                                                                                                                                                                                                                                                                                                                                                                           |
| Manuscript Type:              | Research - Case control study                                                                                                                                                                                                                                                                                                                                                                                                                                                                                                                                                                                                                                                                                                                                                                                                                                                                                                                                                                                                                                                                                                                                                                                                          |
| Date Submitted by the Author: | 16-Sep-2015                                                                                                                                                                                                                                                                                                                                                                                                                                                                                                                                                                                                                                                                                                                                                                                                                                                                                                                                                                                                                                                                                                                                                                                                                            |
| Complete List of Authors:     | Ahmad Khan, Faiz; McGill University, Medicine; McGill University, McGill International TB Center<br>Fox, Greg; McGill University, Respiratory Epidemiology and Clinical Research Unit; McGill University, McGill International TB Center<br>Lee, Robyn; McGill University, McGill International TB Center; McGill University, Epidemiology, Biostatistics and Occupational Health<br>Riva, Mylène; Centre de Recherche du CHU de Québec, Axe Santé des populations et pratiques optimales en santé; Université Laval, Médecine sociale et préventive<br>Benedetti, Andrea; McGill University, Medicine; McGill University, Epidemiology, Biostatistics and Occupational Health<br>Proulx, Jean-François; Nunavik Regional Board of Health & Social Services, Public Health<br>Jung, Shelley; McGill University, Respiratory Epidemiology and Clinical Research Unit; McGill University, Epidemiology, Biostatistics and Occupational Health<br>Hornby, Karen; McGill University, Respiratory Epidemiology and Clinical Research Unit<br>Behr, Marcel ; McGill University, Medicine; McGill University, McGill International TB Center<br>Menzies, Dick; McGill University, Medicine; McGill University, McGill International TB Center |
| Keywords:                     | Aboriginal Health, Infectious Diseases, Respiratory Medicine (Respirology), Community Medicine                                                                                                                                                                                                                                                                                                                                                                                                                                                                                                                                                                                                                                                                                                                                                                                                                                                                                                                                                                                                                                                                                                                                         |
| More Detailed Keywords:       | tuberculosis, housing, Inuit, overcrowding, social determinants, ventilation                                                                                                                                                                                                                                                                                                                                                                                                                                                                                                                                                                                                                                                                                                                                                                                                                                                                                                                                                                                                                                                                                                                                                           |
| Abstract:                     | Background<br>Between November 2011 and November 2012, 7.4% (69/933) of an Inuit village's population developed active tuberculosis (TB); contact investigations involving 695 villagers demonstrated TB infection was very prevalent (435/695, 62.6%), particularly over age 14 (360/457, 78.8%). This event triggered a series of scientific investigations. Genotyping revealed multiple, independent TB outbreaks had occurred during this period. A nested case-control study found nutritional inadequacy was associated with acquisition of infection, but not with progression to disease. Here, we report a nested case-control study investigating housing                                                                                                                                                                                                                                                                                                                                                                                                                                                                                                                                                                   |

1  
2  
3  
4  
5  
6  
7  
8  
9  
10  
11  
12  
13  
14  
15  
16  
17  
18  
19  
20  
21  
22  
23  
24  
25  
26  
27  
28  
29  
30  
31  
32  
33  
34  
35  
36  
37  
38  
39  
40  
41  
42  
43  
44  
45  
46  
47  
48  
49  
50  
51  
52  
53  
54  
55  
56  
57  
58  
59  
60

|  |                                                                                                                                                                                                                                                                                                                                                                                                                                                                                                                                                                                                                                                                                                                                                                                                                                                                                                                                                                                                                                                                                                                                                                                                                                                       |
|--|-------------------------------------------------------------------------------------------------------------------------------------------------------------------------------------------------------------------------------------------------------------------------------------------------------------------------------------------------------------------------------------------------------------------------------------------------------------------------------------------------------------------------------------------------------------------------------------------------------------------------------------------------------------------------------------------------------------------------------------------------------------------------------------------------------------------------------------------------------------------------------------------------------------------------------------------------------------------------------------------------------------------------------------------------------------------------------------------------------------------------------------------------------------------------------------------------------------------------------------------------------|
|  | <p>conditions.</p> <p>Methods<br/>We enrolled 200 contacts. We assessed whether characteristics of the dwelling where they lived were associated with their odds of new TB infection, and/or odds of progression to disease, between November 2011 and November 2012.</p> <p>Results<br/>The participants lived in 79 dwellings. Mean number of persons per room (PPR) was 1.1 (standard deviation:±0.5). Mean room size and ventilation level of the common living space (kitchen and living/dining rooms) were 67.9(±9.4) m<sup>3</sup> and 1.69(±0.26) air changes per hour, respectively. After adjusting for potential confounders, PPR was positively associated with odds of new infection, and odds of disease, but only among participants that lived with someone with smear-positive TB— the minority of participants. Other dwelling characteristics were not associated with either outcome.</p> <p>Interpretation<br/>Reducing household crowding may contribute to TB control. Overall, our investigations have not identified associations that explain the elevated disease risk. Given the high prevalence, treatment of latent infection is an essential intervention for long-term reduction of TB incidence in this village.</p> |
|  |                                                                                                                                                                                                                                                                                                                                                                                                                                                                                                                                                                                                                                                                                                                                                                                                                                                                                                                                                                                                                                                                                                                                                                                                                                                       |

SCHOLARONE™  
Manuscripts

Confidential

1  
2  
3 **Title** Housing and tuberculosis in an Inuit village in Nunavik, Québec: a case-control study

4  
5 **Authors** Faiz Ahmad Khan MD<sup>1,2,3</sup>, Greg J. Fox PhD<sup>2,3</sup>, Robyn S. Lee BSc<sup>2,4</sup>, Mylène Riva PhD  
6  
7  
8<sup>5,6</sup>, Andrea Benedetti PhD<sup>1,4</sup>, Jean-Francois Proulx MD<sup>7</sup>, Shelley Jung MScPH<sup>3</sup>, Karen Hornby  
9  
10 MSc<sup>3</sup>, Marcel A. Behr MD<sup>1,2</sup>, Dick Menzies MD<sup>1,2,3\*</sup>

11  
12  
13  
14  
15  
16 **Institutional affiliations** <sup>1</sup> Department of Medicine, McGill University, Montreal, Quebec,  
17  
18 Canada; <sup>2</sup> McGill International TB Centre, Montreal, Quebec, Canada; <sup>3</sup> Respiratory  
19  
20 Epidemiology and Clinical Research Unit, Montreal Chest Institute, Montreal, Quebec, Canada; <sup>4</sup>  
21  
22 Department of Epidemiology, Biostatistics and Occupational Health, McGill University, Québec,  
23  
24 Canada; <sup>5</sup> Axe Santé des populations et pratiques optimales en santé, Centre de Recherche du  
25  
26 CHU de Québec, Québec, Canada; <sup>6</sup> Département de médecine sociale et préventive, Université  
27  
28 Laval, Québec, Canada; <sup>7</sup> Department of Public Health, Nunavik Regional Board of Health and  
29  
30 Social Services  
31  
32  
33  
34

35  
36 **\*Corresponding author** Dr. Dick Menzies

37  
38 McGill University Health Centre

39  
40 1001 boulevard Décarie, Room D05.2510, Montréal, Québec H4A 3J1 CANADA

41  
42  
43 Tel: 1-514-934-1934 ext 32128/32129; Fax: 1-514-843-2083

44  
45  
46 Email: [Dick.Menzies@McGill.ca](mailto:Dick.Menzies@McGill.ca)  
47  
48  
49  
50  
51  
52  
53  
54  
55  
56  
57  
58  
59  
60

**ABSTRACT** (249 words)**Background**

Between November 2011 and November 2012, 7.4% (69/933) of an Inuit village's population developed active tuberculosis (TB); contact investigations involving 695 villagers demonstrated TB infection was very prevalent (435/695, 62.6%), particularly over age 14 (360/457, 78.8%). This event triggered a series of scientific investigations. Genotyping revealed multiple, independent TB outbreaks had occurred during this period. A nested case-control study found nutritional inadequacy was associated with acquisition of infection, but not with progression to disease. Here, we report a nested case-control study investigating housing conditions.

**Methods**

We enrolled 200 contacts. We assessed whether characteristics of the dwelling where they lived were associated with their odds of new TB infection, and/or odds of progression to disease, between November 2011 and November 2012.

**Results**

The participants lived in 79 dwellings. Mean number of persons per room (PPR) was 1.1 (standard deviation:  $\pm 0.5$ ). Mean room size and ventilation level of the common living space (kitchen and living/dining rooms) were  $67.9(\pm 9.4)$  m<sup>3</sup> and  $1.69(\pm 0.26)$  air changes per hour, respectively. After adjusting for potential confounders, PPR was positively associated with odds of new infection, and odds of disease, but only among participants that lived with someone with smear-positive TB— the minority of participants. Other dwelling characteristics were not associated with either outcome.

**Interpretation**

1  
2  
3 Reducing household crowding may contribute to TB control. Overall, our investigations have  
4  
5 not identified associations that explain the elevated disease risk. Given the high prevalence,  
6  
7 treatment of latent infection is an essential intervention for long-term reduction of TB  
8  
9 incidence in this village.  
10  
11  
12  
13  
14  
15  
16  
17  
18  
19  
20  
21  
22  
23  
24  
25  
26  
27  
28  
29  
30  
31  
32  
33  
34  
35  
36  
37  
38  
39  
40  
41  
42  
43  
44  
45  
46  
47  
48  
49  
50  
51  
52  
53  
54  
55  
56  
57  
58  
59  
60

Confidential

**INTRODUCTION (words=3316)**

Between 2008 and 2012, average annual tuberculosis (TB) incidence among the Inuit in Canada was 190 per 100,000, compared to a national average of 5 per 100,000 [1-5]. The reasons for this dramatic difference are unclear, although major disparities in socioeconomic status [6], and general health [7, 8] are thought to contribute.

Housing has been a concern for Inuit communities for several years owing to the high prevalence of overcrowding and disrepair of dwellings [9, 10]. While housing is widely regarded as an important determinant of TB [11, 12], there is surprisingly little evidence supporting a causal association between housing conditions and TB infection or disease. Associations between crowded housing and TB have mostly been reported in ecologic studies [13-15], but these community-level associations could have been due to confounding by other social, environmental, or biological determinants of TB that are often co-prevalent with crowded households. An association between low ventilation—which is the exchange of indoor air with outdoor air—and the risk of TB infection has been demonstrated in healthcare settings [16], but its role in TB transmission in homes has not been established.

Between November 2011 and November 2012, an Inuit village in Nunavik (Québec) experienced a surge in the occurrence of active TB [17]. During this year, 5.4% of the village's population (50/933) were diagnosed with culture-confirmed TB and another 2.0% (19/933) with clinically probable TB disease. As part of an intensified medical and public health response, 695 villagers were evaluated for TB infection or disease during this period. Our study was motivated by two observations: 1) the elevated rate of newly diagnosed TB infection ("new TB infection")

1  
2  
3 among villagers evaluated as contacts during this period (27.1%, 188/695) ; and, 2) the very  
4  
5 high rate of active disease – 28.2% (53/188) – among contacts with new TB infection. While  
6  
7 similar rates of TB disease have been reported in outbreaks of multidrug-resistant strains [18]  
8  
9 and among people living with HIV [19], neither of these were contributing factors in this village.  
10  
11 By November 2012, TB notifications had returned to baseline; hence, we planned an intensive  
12  
13 investigation of the association between demographic, economic, housing, dietary, and lifestyle  
14  
15 factors and the acquisition of infection or development of disease that had occurred during the  
16  
17 period of elevated incidence (November 2011 to November 2012). In parallel, whole-genome  
18  
19 sequencing of all isolates from culture-positive cases demonstrated that the surge in incidence  
20  
21 was not related to the introduction of a new strain, nor the emergence of a more transmissible  
22  
23 or virulent organism [17]. Sequencing also revealed that the surge had resulted from the  
24  
25 contemporaneous occurrence of at least six independent reactivation events with multiple  
26  
27 chains of transmission rather than a single point-source outbreak [17]. A detailed evaluation of  
28  
29 dietary and lifestyle factors identified inadequate intake of fruits and vegetables, and also of  
30  
31 carbohydrates, as nutritional factors associated with infection [20]. These variables were not  
32  
33 associated with disease.  
34  
35  
36  
37  
38  
39  
40  
41  
42  
43

44 This paper focuses on the relationship between TB outcomes and housing characteristics. Our  
45  
46 two main objectives were to determine if characteristics of an individual's dwelling were  
47  
48 associated with: (1) acquisition of new TB infection; and (2) progression to confirmed or  
49  
50 probable disease among those with TB infection.  
51  
52  
53  
54

## 55 **METHODS**

56  
57  
58  
59  
60

## Ethics

This study was approved by the Nunavik Nutrition and Health Committee, the mayor and municipal council of the village, and the Institutional Review Board of McGill University.

## Consent for questionnaires

Informed consent was obtained from each participant, or their parent/guardian, prior to the administration of study questionnaires. For the housing assessment, consent was obtained from the individual identified as the head of the household.

## Setting

Between November 2011 and November 2012, 695 of 933 persons residing in the village were identified as a contact of at least one person with active TB, or diagnosed with active TB.

Evaluation of these individuals included a detailed clinical history, physical examination, plain chest radiograph, and tuberculin skin testing (TST) (performed among those who did not have a documented prior positive TST). All contacts with radiographic or clinical suspicion of TB disease submitted three spontaneous or induced sputum samples which were sent for acid-fast microscopy and liquid culture. As the village has little in-migration, one clinic and a single public health authority, villagers' medical records provided complete information on lifelong past investigations for TB infection or disease.

In accordance with Canadian standards [21] a positive TST reaction was defined as 5mm or greater if the TST was performed as part of contact investigations during this period. *New positive TST* was defined as a positive TST performed during this period without any previously



1  
2  
3 documented TST. *TST conversion* was defined as a reaction of 5mm or greater, and a previous  
4  
5  
6 TST reading of less than 5mm, or an increase of 6mm or more from previous TST measuring 5 to  
7  
8  
9 9mm.

10  
11 By November 2012, among 695 community members investigated, 92 (13.2%) had been treated  
12  
13 for active TB. Of these, 50 (7.2%) had culture-confirmed disease and 19 (2.7%) clinically  
14  
15 probable disease (defined below). There were no cases of confirmed or clinically probable TB  
16  
17 among villagers with a negative TST. As shown in **Figure 1**, 247/695 (35.5%) had been  
18  
19 documented as TST-positive prior to November 2011, and 188/695 (27.1%) were documented  
20  
21 to have a new positive TST or a TST conversion between November 2011 and November 2012.  
22  
23  
24 Prevalence of infection was 89.3% (208/233) in the age group 30 years or older, 67.9%  
25  
26 (152/224) among those 15 to 29 years old, and 31.6% (75/237) in the age group 14 years or  
27  
28 younger. Across all age groups, the rate of disease was highest among newly infected contacts  
29  
30 (**Figure 2**). Persons considered to have TB disease, or latent infection, were treated according  
31  
32 to Canadian standards.[21] By November 2012, among contacts that were not treated for active  
33  
34 TB, treatment for latent infection had been initiated in 94.5% (121/135) of those with a new  
35  
36 positive TST or TST conversion.  
37  
38  
39  
40  
41  
42  
43  
44

#### 45 *Study definitions*

46  
47  
48  
49 Based on detailed clinical information collected between November 2011 and November 2012  
50  
51 we grouped all investigated contacts into one of three categories: (1) New TB infection, defined  
52  
53 as a new positive TST or TST conversion; (2) Prior positive TST, defined as a positive TST  
54  
55 documented before November 2011; (3) Uninfected, defined as at least one negative TST  
56  
57  
58  
59  
60

1  
2  
3 between November 2011 and November 2012, with no prior positive TST result, and no TB  
4  
5 disease. We categorized villagers treated for active TB as having confirmed TB disease if they  
6  
7 had at least one positive culture for *M. tuberculosis*, or probable TB disease if there were typical  
8  
9 clinical and radiological features, including response to therapy, but without culture  
10  
11 confirmation. This designation was made by two experienced chest physicians, who  
12  
13  
14  
15  
16 independently reviewed all clinical and radiological information.  
17  
18

### 19 **Study design & Outcomes**

20  
21  
22 We conducted a case-control study nested within the 695 persons who were identified and  
23  
24 investigated between November 2011 and November 2012. The study was undertaken  
25  
26 between February and July of 2013. For our first objective, we compared participants with new  
27  
28 TB infection (regardless of their disease status) to a control group of contacts that were  
29  
30 uninfected. For the second objective, we compared participants with confirmed or probable  
31  
32 disease to a control group comprised of those with infection but no disease.  
33  
34  
35  
36  
37  
38

### 39 **Participants**

40  
41  
42 Community members were eligible for inclusion if, between November 2011 and November  
43  
44 2012, they had resided in the village and were either diagnosed with confirmed or probable TB  
45  
46 disease, or had been investigated as contacts of someone with confirmed or probable disease  
47  
48 with at least (a) one TST performed during this period, or (b) documented prior positive TST.  
49  
50  
51

52  
53  
54 For the first objective, we aimed to recruit persons with new infection to serve as cases and an  
55  
56 equal number of uninfected persons, to serve as controls. For the second objective, we planned  
57  
58  
59  
60

1  
2  
3 to recruit as many persons with confirmed or probable active TB as possible, and aimed to  
4  
5 recruit twice as many persons without disease but with TB infection to serve as controls.  
6  
7

### 8 9 **Data collection**

10  
11  
12 The Online Supplement provides details about questionnaires, definitions of socioeconomic  
13  
14 variables and housing characteristics, the methods for measuring and extrapolating ventilation  
15  
16 levels, and our approach to multivariable analyses.  
17  
18

19  
20  
21 Trained study staff administered questionnaires assessing housing, nutrition, socioeconomic,  
22  
23 and lifestyle factors [20]. Parents or guardians provided responses for children aged up to 12.  
24  
25

26  
27 We used information collected during contact investigations, and from the study  
28  
29 questionnaires, to determine whether participants could have been exposed to TB in their own  
30  
31 home, or in other dwellings that they visited at least weekly. Community members had raised  
32  
33 concerns that individuals were at greater risk of TB if they had visited a subset of dwellings that  
34  
35 had been used for social activities. To address these concerns, we specifically evaluated  
36  
37 whether visiting these dwellings, at least once weekly, was associated with each study  
38  
39 outcome.  
40  
41  
42  
43

44  
45  
46 The dwelling of each participant was visited by study personnel to administer questionnaires,  
47  
48 and perform a standardized walk through assessment (for enumerating rooms and assessing  
49  
50 need for major repairs). In accordance with Statistics Canada, the kitchen, living/dining area,  
51  
52 and bedrooms were counted as rooms [22].  
53  
54  
55  
56  
57  
58  
59  
60

1  
2  
3 Ventilation was measured in air changes per hour (ACH), in the rooms where participants slept  
4  
5 and in the common living area (living, dining and kitchen area which were contiguous in all  
6  
7 dwellings), using CO<sub>2</sub> as a tracer gas, as described elsewhere [23, 24]. In dwellings with “forced  
8  
9 air” heating systems which blow heated outdoor air into rooms, measurements were taken  
10  
11 with the heating both on and off. Because the design and construction of many dwellings were  
12  
13 identical, ventilation was not directly measured in all dwellings of the same type. Instead, these  
14  
15 were assigned the weighted average ACH measured in dwellings of the same construction  
16  
17 model and layout; these average values were estimated using multi-level linear regression.  
18  
19  
20  
21  
22  
23  
24  
25  
26  
27  
28  
29  
30  
31  
32  
33  
34  
35  
36  
37  
38  
39  
40  
41  
42  
43  
44  
45  
46  
47  
48  
49  
50  
51  
52  
53  
54  
55  
56  
57  
58  
59  
60

Details are found in the Online Supplement.

To determine the occupancy level (i.e. “crowdedness”) that each participant had been exposed to between November 2011 and November 2012, we used a census list created as part of the public health response to ascertain the number of persons that lived in each dwelling during that period. We divided the total number of occupants by the number of rooms in each dwelling to obtain our measure of occupancy— persons per room. Per Statistics Canada, we defined “overcrowding” as greater than 1 person per room in the dwelling [22].

### Statistical Methods

The level of analysis was the individual. We used the method of generalized estimating equations for logistic regression, with clustering at the dwelling level, to identify associations between each outcome of interest and housing characteristics, potential TB exposures in dwellings, and factors recognized as important determinants of TB (e.g. smoking tobacco). To analyze ventilation as a risk factor for TB, we used the ventilation level in the common living

1  
2  
3 area of participants' dwellings— since all household occupants shared these areas, and many  
4  
5 slept in these areas. We used interaction terms to test the hypothesis that occupancy level  
6  
7 would be associated with TB transmission in dwellings where someone with smear-positive TB  
8  
9 lived. Because our results supported this hypothesis, we used the same approach to analyze the  
10  
11 impact of occupancy on disease. Additional details are found in the Online Supplement. The  
12  
13 multivariable models in this report do not adjust for measures of nutritional inadequacy; a  
14  
15 detailed evaluation of nutritional factors is reported elsewhere [20].  
16  
17  
18  
19  
20

## 21 22 **RESULTS**

### 23 24 25 *Study population*

26  
27  
28  
29 Details about enrollment, and comparisons between participants and non-participants have  
30  
31 been previously reported [20]. Of 695 eligible villagers, 200 were enrolled in the study; within  
32  
33 each TST category, age and gender distributions were similar among participants and non-  
34  
35 participants (**Online Supplement Figure S1, Tables S1A & S1B**). Similarly, among villagers with  
36  
37 confirmed or probable TB disease, participants and non-participants shared similar age and  
38  
39 gender distributions, and also proportions in each TST category (**Online Supplement Table S1B**).  
40  
41  
42  
43

44  
45 Of the 200 villagers enrolled, 67 (34%) were uninfected, 88 (44%) had new TB infection, and 45  
46  
47 (23%) had a prior positive TST. Of the 133 participants with TB infection, 44 (22%) had  
48  
49 confirmed (n=33) or probable (n=11) TB disease, and 89 (44.5%) had TB infection with no  
50  
51 disease. Among participants, the mean ( $\pm$  standard deviation) age was 21.5 ( $\pm$  14.1) years, 107  
52  
53  
54  
55  
56  
57  
58  
59  
60

1  
2  
3 (54%) were female, 118 (59%) were current smokers, and 118 (59%) had an annual personal  
4  
5  
6 income less than \$20,000 (for children, this was the income of their parent or guardian).  
7  
8

9  
10 *Housing characteristics*

11  
12  
13 **Table 1** summarizes the characteristics of 78 of the 79 dwellings where the 200 participants  
14  
15  
16 resided between November 2011 and November 2012. We could not determine the  
17  
18 characteristics for one dwelling because the participant had moved prior to the study and  
19  
20 research staff could not gain access to their original residence. These 78 dwellings comprised  
21  
22  
23 40% of all dwellings in the village. The majority of dwellings used forced air heating systems,  
24  
25  
26 and in these dwellings, ACH were higher when the heating was on.  
27  
28

29  
30 Community members identified 18 dwellings that had been used for social activities. These  
31  
32 dwellings' characteristics were similar to the other 178 dwellings in the village (**Online**  
33  
34 **Supplement Table S2**).  
35  
36

37  
38 *Determinants of new TB infection*

39  
40  
41 As shown in **Table 2**, in univariable analyses, participants with new TB infection were  
42  
43  
44 significantly more likely than uninfected participants to have visited, at least once weekly, a  
45  
46  
47 dwelling that was used for social activities. Newly infected participants were also more likely to  
48  
49 have lived in a dwelling with someone who had smear-positive TB.  
50  
51

52  
53 The method of heating, level of ventilation, and the volume of the living area, were not  
54  
55 associated with infection, and did not meet criteria for inclusion in multivariable analyses  
56  
57 (**Table 3**). Age greater than 14 years old, and visiting dwellings used for social activities at least  
58  
59  
60

1  
2  
3 once weekly, were associated with new infection. The effect of occupancy (as measured by  
4 persons per room) on infection was dependent on living with someone with smear-positive TB.  
5  
6 Among participants that had lived with someone who had smear-positive TB, odds of new  
7 infection increased as the number of persons per room increased; this association was not seen  
8 among those that had not lived with someone who had smear-positive TB. This interaction also  
9 meant that the association between living with someone who had smear-positive TB and  
10 infection was stronger in dwellings with more persons per room (the odds ratios for this  
11 association shown in Table 3 corresponds to living in a dwelling with 1.2 persons per room,  
12 which was the median value for this variable).  
13  
14  
15  
16  
17  
18  
19  
20  
21  
22  
23  
24  
25  
26

#### 27 *Determinants of TB disease among participants with TB infection*

28  
29  
30 As shown in **Table 4**, in univariable analyses amongst participants with TB infection, active TB  
31 was not associated with visiting dwellings used for social activities, or with having lived with  
32 someone who had disease.  
33  
34  
35  
36  
37  
38

39 As seen in **Table 5**, the heating method and ventilation level were not associated with disease.  
40 Living area size was associated in univariable but not multivariable analysis. We again observed  
41 an interaction between occupancy and living with someone with smear-positive TB — the odds  
42 of disease increased with the number of persons per room only among participants that had  
43 lived with someone who had smear-positive TB. This analysis also demonstrated that risk of  
44 disease was significantly higher among participants with new compared to previous TB  
45 infection, after adjusting for potential confounders.  
46  
47  
48  
49  
50  
51  
52  
53  
54  
55  
56  
57  
58  
59  
60

## DISCUSSION

During a twelve month period when the incidence of TB dramatically increased in this village, the number of persons per room was the only housing characteristic associated with new TB infection — and it was only associated among participants that had lived with someone who had smear-positive disease. Similarly, the number of persons per room was the only housing characteristic associated with progression to TB disease among infected participants, and this association was also dependent on living with someone who had smear-positive TB. Other factors associated with new TB infection were: age over 14 years old, visiting one of the dwellings that was used for socializing, and having lived with someone who had smear-positive TB. Prior TB infection was the only other factor associated with disease (against which it was protective).

Our results suggest that crowding in houses negatively affects TB control in Canada's Northern communities. Our findings also suggest that crowding affects TB risk amongst individuals living in a household where someone has developed smear-positive TB. However, as the majority of participants with active TB did not live in such households, crowding alone does not explain the very elevated risk of disease in this village.

Very little is known about the role of ventilation on TB transmission in people's homes. While the level of ventilation in healthcare settings has been shown to affect the risk of TB infection amongst healthcare workers, in our study, air exchange rates in participants' dwellings were not associated with infection. We speculate that exposure to TB-containing droplet particles was so intense during interactions in people's homes, that air exchange rates within the range of



1  
2  
3 values measured in our study were insufficient to produce an observable reduction in the  
4  
5 probability of transmission. It is plausible that exposure intensity is greater in people's homes  
6  
7 compared to other settings, due to greater duration or closer physical proximity of interactions.  
8  
9 This may apply to other airborne infections of the respiratory tract— a study of Inuit infants on  
10  
11 Baffin Island also did not find an association between ventilation and lower respiratory tract  
12  
13 infections [25]. Given the lack of association in our study — and the absence of other published  
14  
15 data on the effects of residential ventilation on TB transmission — increasing air exchange rates  
16  
17 in houses cannot be considered as a reliable intervention for reducing the incidence of TB  
18  
19 infection in this village, or other Inuit communities.  
20  
21  
22  
23  
24  
25  
26

27 This study had a number of limitations, including the timing of the study, which was initiated a  
28  
29 few months after public health authorities considered TB incidence to have returned to  
30  
31 baseline. This delay was unavoidable— given the need to allow the health services to complete  
32  
33 all necessary evaluations and initiate treatment for active and latent TB plus the complexities of  
34  
35 arranging a scientific investigation in a remote community. However, bias due to this delay is  
36  
37 unlikely as all participants—even those that had moved— were assigned the characteristics of  
38  
39 their original residence (except one); furthermore, characteristics of houses are unlikely to have  
40  
41 changed substantially before the study was undertaken.  
42  
43  
44  
45  
46  
47

48 Strengths of the study included the availability of detailed medical records for all participants  
49  
50 (usually lifelong records) that allowed accurate categorization of persons as having new or prior  
51  
52 TB infection, and probable or confirmed disease. This permitted a unique study of risk factors  
53  
54 for acquisition of infection, and for progression to disease among those infected, within the  
55  
56  
57  
58  
59  
60

1  
2  
3 same population. In addition, we conducted a very thorough evaluation of housing, which  
4  
5 included a standardized walk-through assessment, enumeration of occupancy, and direct  
6  
7 measurement of outdoor air exchange rates (ventilation) using a validated protocol based on  
8  
9 tracer gas techniques [23]. To account for seasonal fluctuations in air exchange rates, we  
10  
11 manipulated the heating system to simulate different conditions, although we were unable to  
12  
13 account for all other factors (outdoor temperature, indoor activities) that may influence  
14  
15 ventilation.  
16  
17  
18  
19  
20

## 21 **Conclusions**

22  
23  
24  
25 This is the third report from a series of investigations that were undertaken to understand why  
26  
27 an Inuit village experienced a surge in the occurrence of active TB between November 2011 and  
28  
29 November 2012. Despite a rigorous evaluation that has included whole genome sequencing of  
30  
31 all culture-positive isolates [17], and studying the role of nutritional [20], lifestyle [20], and  
32  
33 housing characteristics — we have been unable to identify the factors that clearly explain the  
34  
35 elevated disease rate. Our findings suggest that improved nutrition and less crowding in  
36  
37 households may contribute to reducing the risk of TB infection. However, given that the impact  
38  
39 of nutritional, lifestyle, or housing interventions on the risk of active TB remains uncertain,  
40  
41 similar events could happen in other villages where TB infection is highly prevalent. Hence  
42  
43 treatment of latent TB infection should be even further emphasized to achieve long-term  
44  
45 reduction in TB incidence in this village, and other communities where TB infection is highly  
46  
47 prevalent.  
48  
49  
50  
51  
52  
53  
54  
55  
56  
57  
58  
59  
60

1  
2  
3 **Declaration of interests**  
4

5  
6 The authors declare no competing interests.  
7

8 **Acknowledgments**  
9

10 We thank the following for their help during the conduct of this study: The residents, village  
11 council, and Mayoress of the village, all staff of the clinic in the village, Matthew German, Janice  
12 Baron, Nikita Etok, Louisa Etok, Elena Labranche and other members of the region’s Inuit health  
13 authority—the Nunavik Regional Board of Health and Social Services.  
14  
15  
16  
17  
18  
19

20  
21 The study was made possible through funding from the Foundation of the Royal Victoria  
22 Hospital, Canadian Institutes of Health Research (Operating Grant MOP-125858), and the Public  
23 Health Agency of Canada.  
24  
25  
26  
27  
28  
29

30 FAK is the recipient of salary support from the FRQS.  
31  
32  
33  
34  
35  
36  
37  
38  
39  
40  
41  
42  
43  
44  
45  
46  
47  
48  
49  
50  
51  
52  
53  
54  
55  
56  
57  
58  
59  
60

1  
2  
3  
4  
5  
6  
7  
8  
9  
10  
11  
12  
13  
14  
15  
16  
17  
18  
19  
20  
21  
22  
23  
24  
25  
26  
27  
28  
29  
30  
31  
32  
33  
34  
35  
36  
37  
38  
39  
40  
41  
42  
43  
44  
45  
46  
47  
48  
49  
50  
51  
52  
53  
54  
55  
56  
57  
58  
59  
60

**Figure 1. Percentage of contacts investigated between November 2011 and November 2012 who were uninfected, newly infected, or previously infected.<sup>†</sup>**

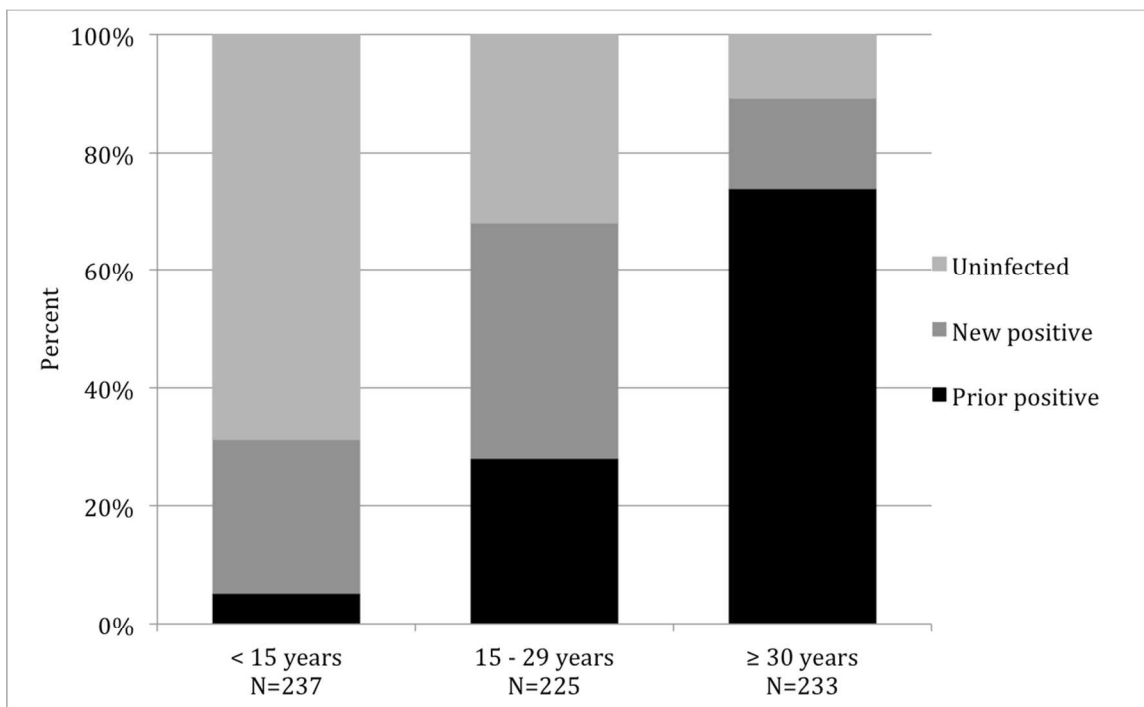

<sup>†</sup> *New positive* and *prior positive* categories include contacts with disease and also contacts that did not develop disease between November 2011 and November 2012. No TST (tuberculin skin test) negative (uninfected) person developed confirmed or probable TB disease.

Figure 2 – Percentage of contacts who developed microbiologically confirmed or probable active TB disease, by TST status and age group

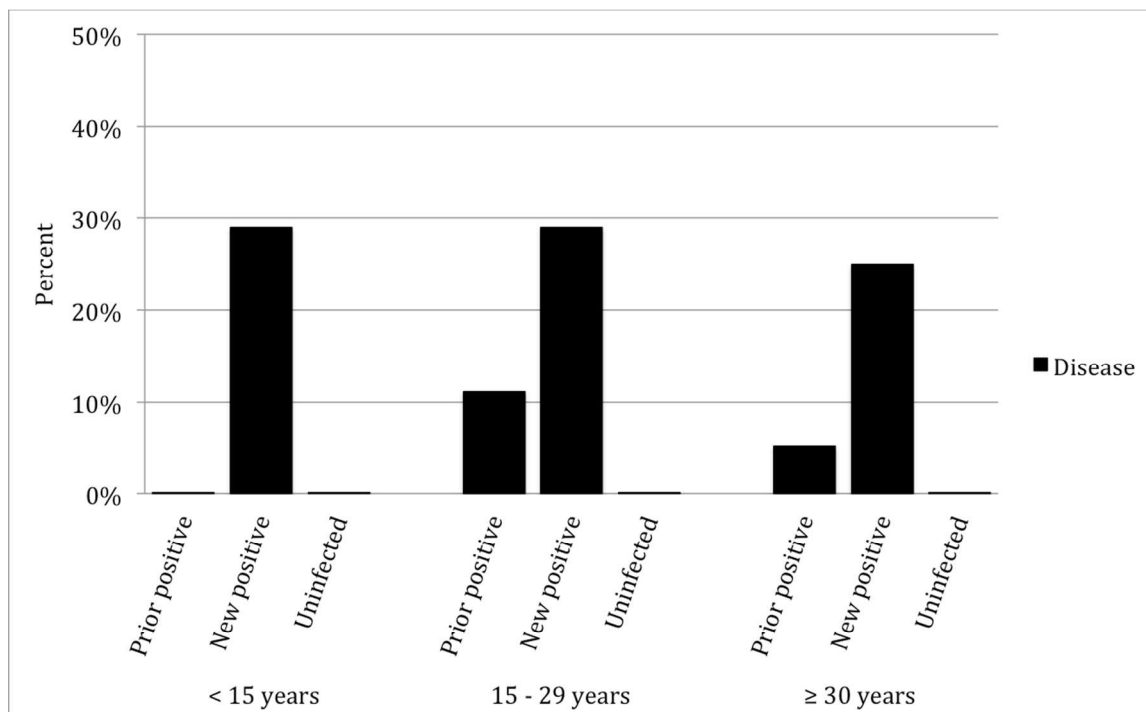

TST, tuberculin skin test

**Table 1. Characteristics of 79 dwellings where study participants lived between November 2011 and November 2012<sup>†</sup>**

| <b>Dwelling characteristic</b>                      | <b>Summary</b>     |                 |
|-----------------------------------------------------|--------------------|-----------------|
| Total number of dwellings inhabited by participants | 79                 |                 |
| Years since dwelling was built, mean $\pm$ SD       | 19.3 $\pm$ 8.2     |                 |
| <i>Heating method, N(%)</i>                         |                    |                 |
| Radiator                                            | 8 (10%)            |                 |
| Forced air                                          | 70 (90%)           |                 |
| <i>Dwelling occupancy</i>                           |                    |                 |
| Number of occupants, mean $\pm$ SD                  | 6.1 $\pm$ 3.0      |                 |
| Persons per room, <sup>††</sup> mean $\pm$ SD       | 1.1 $\pm$ 0.5      |                 |
| Overcrowded, <sup>†††</sup> N(%)                    | 39 (50%)           |                 |
| <i>Ventilation*</i>                                 |                    |                 |
| Air changes per hour (ACH)                          | <i>Living area</i> | <i>Bedrooms</i> |
| ACH with heating off, mean $\pm$ SD                 | 0.67 $\pm$ 0.28    | 0.31 $\pm$ 0.28 |
| ACH with heating on, mean $\pm$ SD                  | 1.69 $\pm$ 0.26    | 1.29 $\pm$ 0.29 |
| Volume of room, m <sup>3</sup> , mean $\pm$ SD      | 67.9 $\pm$ 9.4     | 27.7 $\pm$ 4.4  |

<sup>†</sup> Data on dwelling characteristics were available for 78/79 dwellings. We could not determine the characteristics for one dwelling because one participant had moved before the study and research personnel could not access their original residence. Five dwellings were studio apartments without separate bedrooms.

<sup>††</sup> Calculated by dividing the number of occupants by the total number of rooms in the dwelling.

<sup>†††</sup> Statistics Canada's defines "overcrowded" as occupancy exceeding 1 person per room.

\* Dwellings in this community are grouped into five main construction types that share the same design and layout. Ventilation was directly measured using tracer gas technique in 52 dwellings. Dwellings where ventilation was not directly measured were assigned the average ventilation level of dwellings of the same construction type. The average ventilation values for each construction type were calculated using multi-level multivariable linear regression techniques (See Online Supplement "Methods Supplement, Section 2" for details).

**Table 2. Associations between acquisition of TB infection and potential exposures to villagers with active TB when visiting other dwellings, or at home.**

| Variable                                                                                                                    | Newly infected <sup>†</sup><br>N = 88 | Uninfected<br>N = 67 |       |
|-----------------------------------------------------------------------------------------------------------------------------|---------------------------------------|----------------------|-------|
|                                                                                                                             | N (%)                                 | N (%)                | p     |
| Number of participants who reported visiting at least one dwelling, at least once weekly                                    | 84 (96%)                              | 64 (96%)             | 1.0   |
| Number of participants who visited a dwelling that was NOT used for social activities, at least once weekly (178 dwellings) |                                       |                      |       |
| Any of these dwellings                                                                                                      | 77 (88%)                              | 63(94%)              | 0.17  |
| A dwelling where villager with TB disease lived or visited                                                                  | 53 (60%)                              | 49 (73%)             | 0.09  |
| Number of participants who visited a dwelling used for social activities, at least once weekly (18 dwellings)               |                                       |                      |       |
| Any of these dwellings                                                                                                      | 47 (53%)                              | 16 (24%)             | <0.01 |
| A dwelling where villager with TB disease lived or visited                                                                  | 34 (39%)                              | 11 (16%)             | <0.01 |
| Number of participants who lived with someone who had TB                                                                    |                                       |                      |       |
| Lived with someone who had TB disease                                                                                       | 42 (48%)                              | 26 (39%)             | 0.34  |
| Lived with someone who had smear-positive TB                                                                                | 20 (23%)                              | 2 (3%)               | <0.01 |
| Lived with someone who had smear-negative TB                                                                                | 36 (40%)                              | 25 (37%)             | 0.77  |

All p-values calculated using the Pearson's Chi-squared or Fisher's exact tests.

<sup>†</sup> This newly infected group includes 53 individuals without disease and 35 individuals with disease.

**Table 3. Factors associated with acquisition of TB infection between November 2011 and November 2012.**

| Variable                                                                           | Newly infected,<br>N=88 <sup>†</sup> | Uninfected,<br>N=67     | Univariable<br>analysis | Multivariable<br>analysis |
|------------------------------------------------------------------------------------|--------------------------------------|-------------------------|-------------------------|---------------------------|
|                                                                                    | N (%) or<br>Mean (± SD)              | N (%) or<br>Mean (± SD) | Crude OR<br>(95% CI)    | Adjusted OR<br>(95% CI)   |
| <i>Age</i>                                                                         |                                      |                         |                         |                           |
| Under 15 years                                                                     | 30 (34%)                             | 45 (67%)                | ref                     | ref                       |
| 15-29 years                                                                        | 44 (50%)                             | 17 (25%)                | <b>3.9 (2.1-7.1)</b>    | <b>5.5 (2.8-10.7)</b>     |
| ≥ 30 years                                                                         | 14 (16%)                             | 5 (8%)                  | <b>4.2 (1.5-12.0)</b>   | <b>5.2 (1.5-18.0)</b>     |
| <i>Gender</i>                                                                      |                                      |                         |                         |                           |
| Male                                                                               | 40 (45%)                             | 31 (46%)                | ref                     | ref                       |
| Female                                                                             | 48 (55%)                             | 36 (54%)                | 1.0 (0.6-1.9)           | 0.8 (0.4-1.8)             |
| <i>Tobacco smoking</i>                                                             |                                      |                         |                         |                           |
| Not currently smoking                                                              | 30 (34%)                             | 40 (60%)                | ref                     | Not in model              |
| Current smoker                                                                     | 58 (66%)                             | 27 (40%)                | <b>2.9 (1.5-5.4)</b>    |                           |
| <i>Annual personal income</i>                                                      |                                      |                         |                         |                           |
| < \$20,000                                                                         | 55 (66%)                             | 36 (56%)                | ref                     | Not in model              |
| ≥ \$20,000                                                                         | 28 (34%)                             | 28 (44%)                | 0.7 (0.3-1.5)           |                           |
| <i>Heating/dwelling type</i>                                                       |                                      |                         |                         |                           |
| Forced air (houses)                                                                | 81 (92%)                             | 64 (97%)                | ref                     | Not in model              |
| Radiator heating (apartments)                                                      | 7 (8%)                               | 2 (3%)                  | 2.8 (0.8-10.2)          |                           |
| <i>Number of persons per room<sup>††</sup></i>                                     |                                      |                         |                         |                           |
| Among participants living with a smear-positive person                             | 1.7 ±0.6                             | 1.1 ±0.7                | 1.5 (0.9-2.3)           | <b>1.8 (1.1-2.9)</b>      |
| Among participants not living with a smear-positive person                         | 1.2 ±0.5                             | 1.3 ±0.4                | 0.9 (0.7-1.1)           | 0.9 (0.7-1.1)             |
| <i>Ventilation with heating on relative to the median (1.66 ACH)<sup>†††</sup></i> |                                      |                         |                         |                           |
| < the median                                                                       | 68 (77%)                             | 51 (76%)                | ref                     | Not in model              |
| ≥ the median                                                                       | 20 (23%)                             | 15 (22%)                | 1.0 (0.4-2.6)           |                           |
| <i>Volume of living area relative to the median (65.5 m<sup>3</sup>)</i>           |                                      |                         |                         |                           |
| < the median                                                                       | 32 (36%)                             | 31 (46%)                | ref                     | Not in model              |
| ≥ the median                                                                       | 56 (64%)                             | 35 (52%)                | 1.6 (0.7-3.6)           |                           |
| <i>Visited a dwelling used for social activities</i>                               | 47 (53%)                             | 16 (24%)                | <b>3.7 (1.7-7.9)</b>    | <b>4.2 (1.8-10.1)</b>     |
| <i>Lived with smear-positive person<sup>*</sup></i>                                | 20 (23%)                             | 2 (3%)                  | <b>9.6 (2.4-38.0)</b>   | 4.7 (0.95- 23.2)          |

OR, odds ratio; CI, confidence interval, ACH, air changes per hour

Confidence intervals where odds ratio excludes 1.0 are in **bold**.

Indicators of nutritional inadequacy were not included in the multivariable analyses reported above; for results of multivariable models assessing nutritional inadequacy see Fox *et al.* [20]

The final multivariable model includes all listed variables, except where indicated, plus an interaction term between occupancy and living with a smear-positive case that was statistically significant ( $p = 0.006$ ).

Data missing on income (N=8), heating type, ventilation and volume (N=1).



1  
2  
3 One participant who had moved since the outbreak and whose original dwelling could  
4 not be accessed was excluded from multivariable analysis.

5  
6 <sup>†</sup> This Newly Infected group includes 53 without disease and 35 with disease.

7 <sup>††</sup> Interaction term between occupancy and living with a smear-positive person was  
8 significant in univariable analysis ( $p=0.049$ ). The crude and adjusted ORs are per 0.2-unit  
9 increment in the number of persons per room. This scale was chosen because it  
10 corresponds to an increment of one occupant in a dwelling with 5 rooms (the median  
11 number of rooms). As an example of interpretation: Among those living with a smear-  
12 positive person in a dwelling with 5 rooms, if we were to compare two participants who  
13 did not live together, and whose dwellings differed in occupancy by 1 person, the  
14 unadjusted odds of new infection would be 50% higher (as the odds ratio is 1.5) for the  
15 participant living in the home with the greater number of occupants.

16  
17 <sup>†††</sup> In the living area. Lowest ventilation measured in the living area also was not  
18 associated with infection (data not shown).

19  
20  
21 \* Adjusted OR shows association between living with someone who had smear-positive  
22 TB and new infection if living in a dwelling with 1.2 persons per room (chosen because it  
23 was the median number of persons per room).  
24  
25  
26  
27  
28  
29  
30  
31  
32  
33  
34  
35  
36  
37  
38  
39  
40  
41  
42  
43  
44  
45  
46  
47  
48  
49  
50  
51  
52  
53  
54  
55  
56  
57  
58  
59  
60

**Table 4. Association between active TB disease, among participants with TB infection, and potential exposures to villagers with active TB when visiting other dwellings, or at home.**

| Variable                                                                                                                    | Disease<br>N = 44<br>N (%) | No Disease<br>N = 89<br>N (%) | <i>p</i> |
|-----------------------------------------------------------------------------------------------------------------------------|----------------------------|-------------------------------|----------|
| Number of participants who reported visiting at least one dwelling, at least once weekly                                    | 41 (93%)                   | 83 (97%)                      | 0.37     |
| Number of participants who visited a dwelling that was NOT used for social activities, at least once weekly (178 dwellings) |                            |                               |          |
| Any of these dwellings                                                                                                      | 37 (84%)                   | 80 (90%)                      | 0.33     |
| A dwelling where villager with TB disease lived or visited                                                                  | 27 (61%)                   | 55 (62%)                      | 0.96     |
| Number of participants who visited dwellings used for social activities, at least once weekly (18 dwellings)                |                            |                               |          |
| Any of these dwellings                                                                                                      | 21 (48%)                   | 50 (56%)                      | 0.46     |
| A dwelling where villager with TB disease lived or visited                                                                  | 14 (32%)                   | 33 (37%)                      | 0.57     |
| Number of participants who lived with someone who had TB                                                                    |                            |                               |          |
| Lived with someone who had TB disease                                                                                       | 21 (48%)                   | 44 (49%)                      | 1.00     |
| Lived with someone who had smear-positive TB                                                                                | 13 (30%)                   | 16 (18%)                      | 0.20     |
| Lived with someone who had smear-negative TB                                                                                | 17 (39%)                   | 42 (47%)                      | 0.45     |

All p-values calculated using the Pearson's Chi-squared or Fisher's exact tests.

<sup>†</sup> This newly infected group includes 53 individuals without disease and 35 individuals with disease.

**Table 5. Factors associated with progression to TB disease from infection between November 2011 and November 2012.**

| Variable                                                                          | Participants with<br>new or prior TB infection |                                                | Univariable<br>analysis<br>Crude OR<br>(95% CI) | Multivariable<br>analysis<br>Adjusted OR<br>(95% CI) |
|-----------------------------------------------------------------------------------|------------------------------------------------|------------------------------------------------|-------------------------------------------------|------------------------------------------------------|
|                                                                                   | Disease,<br>N=44<br>N (%) or<br>Mean (± SD)    | No Disease,<br>N=89<br>N (%) or<br>Mean (± SD) |                                                 |                                                      |
| <i>Age</i>                                                                        |                                                |                                                |                                                 |                                                      |
| Under 15 years                                                                    | 12 (27%)                                       | 19 (21%)                                       | ref                                             | ref                                                  |
| 15-29 years                                                                       | 22 (50%)                                       | 39 (44%)                                       | 0.9 (0.4-2.3)                                   | 1.0 (0.3-2.8)                                        |
| ≥ 30 years                                                                        | 10 (23%)                                       | 31 (35%)                                       | 0.5 (0.2-1.3)                                   | 1.0 (0.3-3.0)                                        |
| <i>Gender</i>                                                                     |                                                |                                                |                                                 |                                                      |
| Male                                                                              | 22 (50%)                                       | 40 (45%)                                       | ref                                             | ref                                                  |
| Female                                                                            | 22 (50%)                                       | 49 (55%)                                       | 0.8 (0.4-1.5)                                   | 0.8 (0.4-1.7)                                        |
| <i>Tobacco smoking</i>                                                            |                                                |                                                |                                                 |                                                      |
| Not currently smoking                                                             | 15 (34%)                                       | 26 (30%)                                       | ref                                             | Not in model                                         |
| Current smoker                                                                    | 29 (66%)                                       | 62 (70%)                                       | 0.8 (0.4-1.8)                                   |                                                      |
| <i>Annual personal income</i>                                                     |                                                |                                                |                                                 |                                                      |
| < \$20,000                                                                        | 31 (77%)                                       | 51 (60%)                                       | ref                                             | ref                                                  |
| ≥ \$20,000                                                                        | 9 (23%)                                        | 34 (40%)                                       | 0.4 (0.2-1.05)                                  | 0.4 (0.2-1.1)                                        |
| <i>Prior TB infection</i>                                                         |                                                |                                                |                                                 |                                                      |
| No documented TST-positive prior to Nov 2011                                      | 35 (79%)                                       | 53 (60%)                                       | ref                                             | ref                                                  |
| Documented TST-positive prior to Nov 2011                                         | 9 (21%)                                        | 36 (40%)                                       | <b>0.4 (0.2-0.8)</b>                            | <b>0.4 (0.2-0.9)</b>                                 |
| <i>Heating/dwelling type</i>                                                      |                                                |                                                |                                                 |                                                      |
| Forced air (houses)                                                               | 41 (93%)                                       | 83 (93%)                                       | ref                                             | Not in model                                         |
| Radiator heating (apartments)                                                     | 3 (7%)                                         | 6 (7%)                                         | 1.0 (0.3-3.4)                                   |                                                      |
| <i>Number of persons per room<sup>†</sup></i>                                     |                                                |                                                |                                                 |                                                      |
| Among participants living with a smear-positive person                            | 1.9 ±0.4                                       | 1.6 ±0.6                                       | <b>1.3 (1.1-1.6)</b>                            | <b>1.3 (1.2-1.5)</b>                                 |
| Among participants not living with a smear-positive person                        | 1.2 ±0.5                                       | 1.1 ±0.5                                       | 1.1 (0.9-1.2)                                   | 1.1 (0.9-1.3)                                        |
| <i>Ventilation with heating on relative to the median (1.66 ACH)<sup>††</sup></i> |                                                |                                                |                                                 |                                                      |
| < the median                                                                      | 36 (82%)                                       | 67 (75%)                                       | ref                                             | Not in model                                         |
| ≥ the median                                                                      | 8 (18%)                                        | 22 (25%)                                       | 0.7 (0.3-1.5)                                   |                                                      |
| <i>Volume of living area relative to the median (65.5 m<sup>3</sup>)</i>          |                                                |                                                |                                                 |                                                      |
| < the median                                                                      | 13 (30%)                                       | 44 (49%)                                       | ref                                             | Not in model                                         |
| ≥ the median                                                                      | 27 (61%)                                       | 59 (66%)                                       | <b>2.3 (1.1-5.0)</b>                            |                                                      |
| <i>Visited any dwelling used for social activities</i>                            | 21 (48%)                                       | 50 (56%)                                       | 0.7 (0.3-1.6)                                   | Not in model                                         |
| <i>Lived with smear-positive person<sup>*</sup></i>                               | 13 (30%)                                       | 16 (18%)                                       | 1.9 (0.9-4.1)                                   | 0.8 (0.3-1.8)                                        |

OR, odds ratio; CI, confidence interval; ACH, air changes per hour

Confidence intervals where odds ratio excludes 1.0 are in **bold**.

Indicators of nutritional inadequacy were not included in the multivariable analyses reported above; for results of multivariable models assessing nutritional inadequacy see Fox *et al.* [20]

1  
2  
3  
4  
5  
6  
7  
8  
9  
10  
11  
12  
13  
14  
15  
16  
17  
18  
19  
20  
21  
22  
23  
24  
25  
26  
27  
28  
29  
30  
31  
32  
33  
34  
35  
36  
37  
38  
39  
40  
41  
42  
43  
44  
45  
46  
47  
48  
49  
50  
51  
52  
53  
54  
55  
56  
57  
58  
59  
60

Adjusted OR from model that includes all variables, except where indicated, plus an interaction term between occupancy and living with a smear-positive case that was statistically significant ( $p=0.042$ ). Eight participants with missing data on income status were excluded from the final model.

<sup>†</sup> Interaction term between occupancy and living with a smear-positive person was not statistically significant in univariable analysis ( $p=0.12$ ), and was significant in the multivariable model ( $p=0.04$ ). The crude and adjusted ORs are per 0.2-unit increment in the number of persons per room. This scale was chosen because it corresponds to an increment of one person in a dwelling with 5 rooms (the median number of rooms). As an example of interpretation: If we were to compare two participants who did not live together, and whose dwellings differed in occupancy by 1 person per room, the unadjusted odds of disease would be 30% higher (as the crude OR is 1.3) for the participant living in the home with the greater number of persons per room.

<sup>††</sup> In the living area. Lowest ventilation measured in the living area also was not associated with disease (data not shown).

\* Adjusted OR shows association between living with someone who had smear-positive TB and disease if living in a dwelling with 1.2 persons per room (chosen because it was the median number of persons per room).

## References

1. Public Health Agency of Canada. Tuberculosis in Canada, 2009- Pre-Release. Ottawa (Canada): Minister of Public Works and Government Services Canada; 2010.
2. Public Health Agency of Canada. Tuberculosis in Canada, 2010- Pre-Release. Ottawa (Canada): Minister of Public Works and Government Services Canada; 2011.
3. Public Health Agency of Canada. Tuberculosis in Canada, 2008. Ottawa (Canada): Minister of Public Works and Government Services Canada; 2012.
4. Public Health Agency of Canada. Tuberculosis in Canada, 2011- Pre-Release. Ottawa (Canada): Minister of Public Works and Government Services Canada; 2012.
5. Public Health Agency of Canada. Tuberculosis in Canada, 2012- Pre-Release. Ottawa (Canada): Minister of Public Works and Government Services Canada; 2013.
6. Duhaime G, Édouard R. Mesures et taux de faible revenu dans l'inuit nunangat. 2012 [cited; Available from: [http://www.chaireconditionautochtone.fss.ulaval.ca/documents/pdf/2012-Faible-Revenu-Note-Finale\(1\).pdf](http://www.chaireconditionautochtone.fss.ulaval.ca/documents/pdf/2012-Faible-Revenu-Note-Finale(1).pdf)]
7. Oliver LN, Peters PA, Kohen DE. Mortality rates among children and teenagers living in Inuit Nunangat, 1994 to 2008. *Health Rep* 2012; 23(3): 17-22.
8. Peters PA. An age- and cause decomposition of differences in life expectancy between residents of Inuit Nunangat and residents of the rest of Canada, 1989 to 2008. *Health Rep* 2013; 24(12): 3-9.

- 1  
2  
3 9. Anaya J. Report of the Special Rapporteur on the rights of indigenous peoples,  
4 James Anaya, on the situation of indigenous peoples in Canada: United Nations; 2014.  
5  
6 Report No.: A/HRC/27/52/Add.2.  
7  
8
- 9  
10  
11 10. Inuit Tapiriit Kanatami. Backgrounder on Inuit and Housing. Ottawa; 2004.  
12
- 13  
14 11. Hargreaves JR, Boccia D, Evans CA, Adato M, Petticrew M, Porter JD. The social  
15  
16 determinants of tuberculosis: from evidence to action. *Am J Public Health* 2011; 101(4):  
17  
18 654-662.  
19
- 20  
21 12. Rasanathan K, Sivasankara Kurup A, Jaramillo E, Lonroth K. The social  
22  
23 determinants of health: key to global tuberculosis control. *The international journal of*  
24  
25 *tuberculosis and lung disease : the official journal of the International Union against*  
26  
27 *Tuberculosis and Lung Disease* 2011; 15 Suppl 2: S30-36.  
28
- 29  
30  
31 13. Baker M, Das D, Venugopal K, Howden-Chapman P. Tuberculosis associated with  
32  
33 household crowding in a developed country. *J Epidemiol Community Health* 2008; 62(8):  
34  
35 715-721.  
36
- 37  
38  
39 14. Stein L. Glasgow tuberculosis and housing. *Tubercle* 1954; 35(8): 195-203.  
40
- 41  
42 15. Clark M, Riben P, Nowgesic E. The association of housing density, isolation and  
43  
44 tuberculosis in Canadian First Nations communities. *Int J Epidemiol* 2002; 31(5): 940-945.  
45
- 46  
47 16. Menzies D, Fanning A, Yuan L, FitzGerald JM. Hospital ventilation and risk for  
48  
49 tuberculous infection in canadian health care workers. Canadian Collaborative Group in  
50  
51 Nosocomial Transmission of TB. *Ann Intern Med* 2000; 133(10): 779-789.  
52  
53  
54  
55  
56  
57  
58  
59  
60

- 1  
2  
3  
4  
5  
6  
7  
8  
9  
10  
11  
12  
13  
14  
15  
16  
17  
18  
19  
20  
21  
22  
23  
24  
25  
26  
27  
28  
29  
30  
31  
32  
33  
34  
35  
36  
37  
38  
39  
40  
41  
42  
43  
44  
45  
46  
47  
48  
49  
50  
51  
52  
53  
54  
55  
56  
57  
58  
59  
60
17. Lee RS, Radomski N, Proulx JF, Manry J, McIntosh F, Desjardins F, Soualhine H, Domenech P, Reed MB, Menzies D, Behr MA. Reemergence and amplification of tuberculosis in the Canadian arctic. *J Infect Dis* 2015; 211(12): 1905-1914.
18. Edlin BR, Tokars JI, Grieco MH, Crawford JT, Williams J, Sordillo EM, Ong KR, Kilburn JO, Dooley SW, Castro KG, et al. An outbreak of multidrug-resistant tuberculosis among hospitalized patients with the acquired immunodeficiency syndrome. *N Engl J Med* 1992; 326(23): 1514-1521.
19. Daley CL, Small PM, Schechter GF, Schoolnik GK, McAdam RA, Jacobs WR, Jr., Hopewell PC. An outbreak of tuberculosis with accelerated progression among persons infected with the human immunodeficiency virus. An analysis using restriction-fragment-length polymorphisms. *N Engl J Med* 1992; 326(4): 231-235.
20. Fox GJ, Lee RS, Lucas M, Ahmad Khan F, Proulx JF, Hornby K, Jung S, Benedetti A, Behr MA, Menzies D. Inadequate Diet is Associated with Acquiring Mycobacterium tuberculosis Infection in an Inuit Community: A Case-Control Study. *Ann Am Thorac Soc* 2015.
21. Canadian Tuberculosis Standards. 6th ed. Canadian Lung Association, Public Health Agency of Canada, Tuberculosis Prevention and Control, Toronto, 2007.
22. Statistics Canada. December 2012 [cited 2013 July 9, 2014]; Available from: <http://www.statcan.gc.ca/concepts/definitions/dwelling-logement01-eng.htm>
23. Menzies R, Schwartzman K, Loo V, Pasztor J. Measuring ventilation of patient care areas in hospitals. Description of a new protocol. *Am J Respir Crit Care Med* 1995; 152(6 Pt 1): 1992-1999.

1  
2  
3 24. Persily AK. Evaluating building IAQ and ventilation with indoor carbon dioxide.  
4  
5  
6 *Transactions-American Society Of Heating Refrigerating And Air Conditioning Engineers*  
7  
8 1997: 103: 193-204.  
9

10  
11 25. Kovesi T, Gilbert NL, Stocco C, Fugler D, Dales RE, Guay M, Miller JD. Indoor air  
12  
13 quality and the risk of lower respiratory tract infections in young Canadian Inuit children.  
14  
15 *CMAJ : Canadian Medical Association journal* 2007: 177(2): 155-160.  
16  
17  
18  
19  
20  
21  
22  
23  
24  
25  
26  
27  
28  
29  
30  
31  
32  
33  
34  
35  
36  
37  
38  
39  
40  
41  
42  
43  
44  
45  
46  
47  
48  
49  
50  
51  
52  
53  
54  
55  
56  
57  
58  
59  
60

Confidential



1  
2  
3  
4  
5 **ONLINE SUPPLEMENT**  
6  
7

8 **Title** Housing and tuberculosis in an Inuit village in Nunavik, Quebec: a case-control  
9  
10 study  
11

12  
13 **Authors** Faiz Ahmad Khan, Greg J. Fox, Robyn S. Lee, Mylène Riva, Andrea Benedetti,  
14  
15 Jean-Francois Proulx, Shelley Jung, Karen Hornby, Marcel A. Behr, Dick Menzies  
16  
17  
18  
19  
20  
21  
22  
23  
24  
25  
26  
27  
28  
29  
30  
31  
32  
33  
34  
35  
36  
37  
38  
39  
40  
41  
42  
43  
44  
45  
46  
47  
48  
49  
50  
51  
52  
53  
54  
55  
56  
57  
58  
59  
60

Confidential

Figure S1: Selection of study participants.

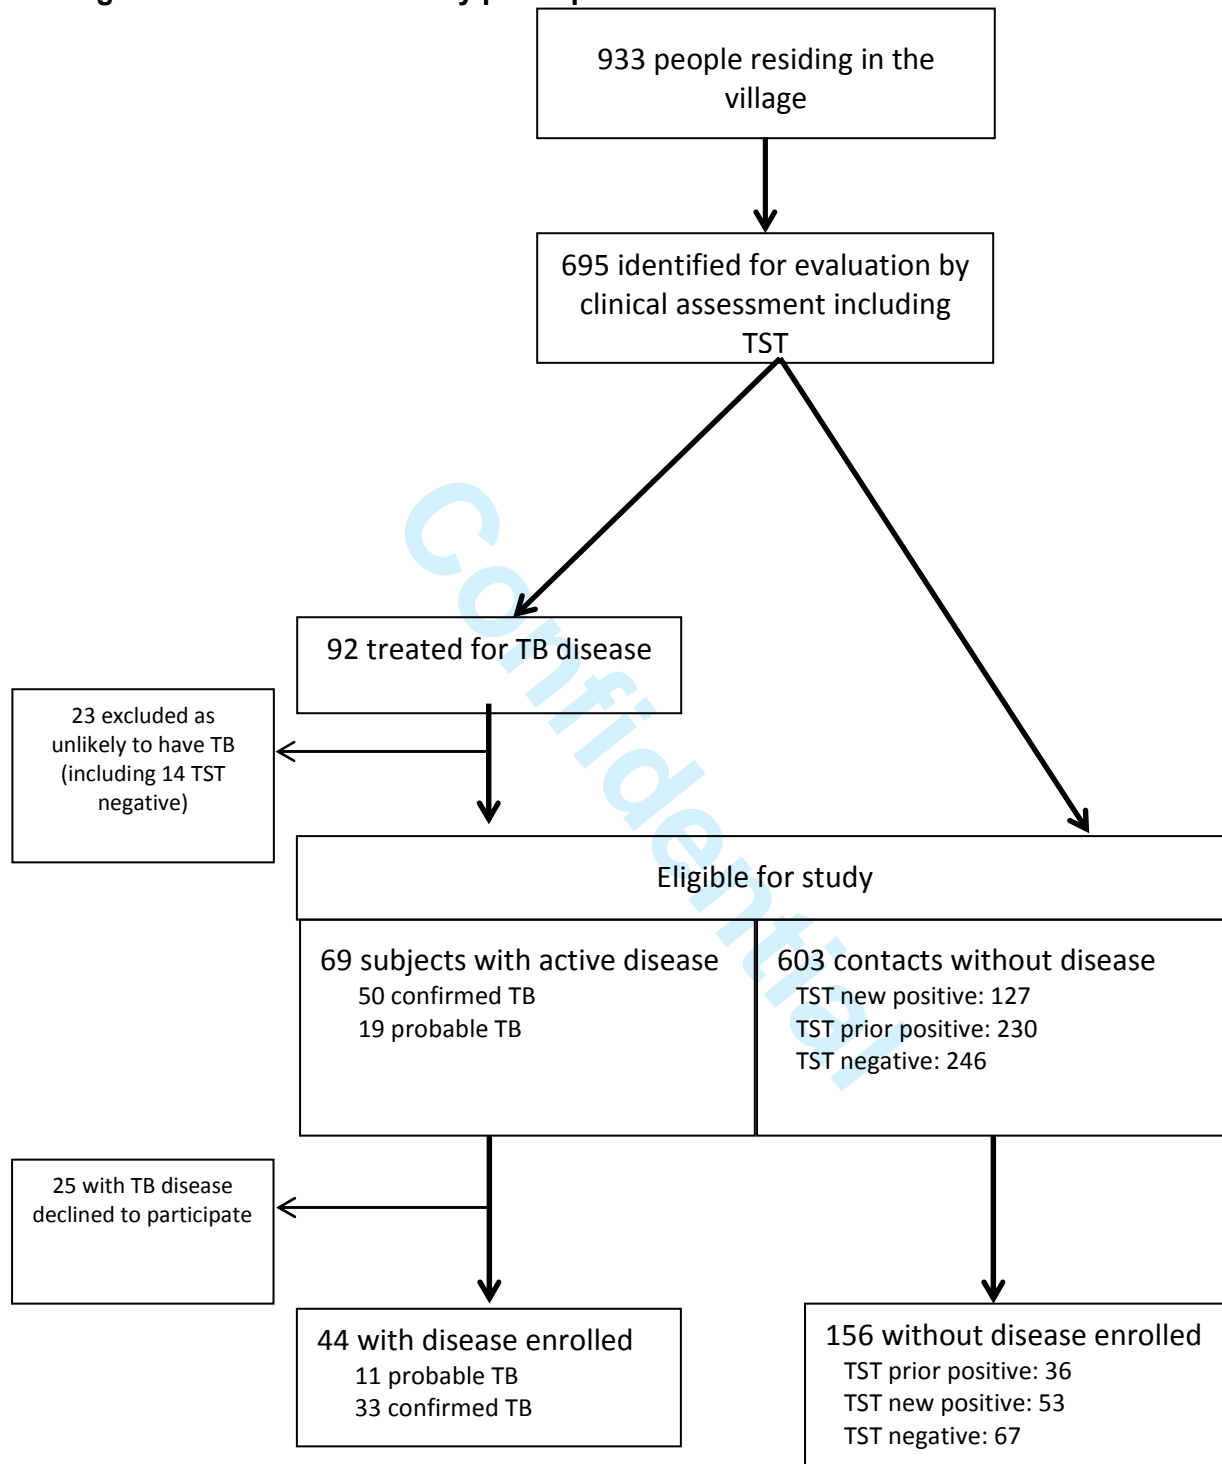

TST = Tuberculin skin test. TB = tuberculosis. Screening comprised a chest radiograph, clinical assessment and TST to determine disease and infection status. Adapted from Fox *et al* [1].

Table S1. Comparison of participants and non-participants.

## (A) By TST category: new infection, prior infection, no infection [1].

| TST category*                | Total | Age group (years) |            |             | Gender      |
|------------------------------|-------|-------------------|------------|-------------|-------------|
|                              |       | 0-14              | 15-29      | ≥ 30        | Male        |
| New infection <sup>¶</sup>   |       |                   |            |             |             |
| Participants                 | 88    | 30 (34.1%)        | 44 (50%)   | 14 (15.9%)  | 40 (45.5%)  |
| Non-participants             | 100   | 32 (32.0%)        | 46 (46.0%) | 22 (22.0%)  | 45 (60.8%)  |
| Prior infection <sup>¶</sup> |       |                   |            |             |             |
| Participants                 | 45    | 2 (4.4%)          | 16 (35.6%) | 27 (60%)    | 22 (48.9%)  |
| Non-participants             | 202   | 11 (5.4%)         | 46 (22.8%) | 145 (71.8%) | 98 (48.8%)  |
| No infection                 |       |                   |            |             |             |
| Participants                 | 67    | 45 (67.2%)        | 17 (25.4%) | 5 (7.5%)    | 31 (46.3%)  |
| Non-participants             | 193   | 117 (60.9%)       | 55 (28.6%) | 20 (10.4%)  | 104 (54.2%) |

## (B) Amongst villagers with confirmed or probable TB disease

| Disease group*   | Total | Age group (years) |          |          | Gender   | TST category  |                 |
|------------------|-------|-------------------|----------|----------|----------|---------------|-----------------|
|                  |       | 0-14              | 15-29    | ≥ 30     | Male     | New infection | Prior infection |
| TB disease       |       |                   |          |          |          |               |                 |
| Participants     | 44    | 12 (27%)          | 22 (50%) | 10 (23%) | 22 (50%) | 35 (80%)      | 9 (20%)         |
| Non-participants | 25    | 6 (24%)           | 11 (44%) | 8 (32%)  | 12 (48%) | 18 (72%)      | 7 (28%)         |

TST, tuberculin skin test; TB, tuberculosis. Gender of 2 non-participants was missing, and age of 1 non-participant in the “No infection” category. \*No significant differences were found between the characteristics of participants and non-participants in any sub-group ( $p > 0.05$  for all comparisons, using Fisher’s exact test). <sup>¶</sup>Includes individuals with or without disease. All individuals with disease had a positive tuberculin skin test.

Table S2. Comparison of dwellings used for social activities to other dwellings in the village.

| Variable                                                                                                         | Dwellings used for social activities | Dwellings that were not used for social activities |
|------------------------------------------------------------------------------------------------------------------|--------------------------------------|----------------------------------------------------|
| Number of dwellings of this type in the village                                                                  | 18                                   | 178                                                |
| Dwelling where at least one study participant lived from Nov 2011-Nov 2012, N(%)                                 | 10 (55.6%)                           | 69 (38.8%)                                         |
| Dwelling where ventilation was measured and at least one study participant lived from Nov 2011-Nov 2012, N(%)    | 4 (22.2%)                            | 47 (26.4%)                                         |
| Number of dwellings of this type visited weekly by at least one participant                                      | 18 (100%)                            | 128 (71.9%)                                        |
| Years since dwelling built (as of 2012), mean ( $\pm$ SD) <sup>†</sup>                                           | 16.4 ( $\pm$ 9.7)                    | 17.4 ( $\pm$ 9.4)                                  |
| Pulsed air heating, N(%) <sup>†</sup>                                                                            | 18 (100%)                            | 137 (80.1%)                                        |
| Number of rooms per dwelling, mean ( $\pm$ SD) <sup>†</sup>                                                      | 6 ( $\pm$ 1)                         | 5 ( $\pm$ 1)                                       |
| ACH in bedrooms with heating off, mean ( $\pm$ SD) <sup>†</sup>                                                  | 0.28 ( $\pm$ 0.11)                   | 0.29 ( $\pm$ 0.19)                                 |
| ACH in bedrooms with heating on, mean ( $\pm$ SD) <sup>†</sup>                                                   | 1.16 ( $\pm$ 0.11)                   | 1.29 ( $\pm$ 0.27)                                 |
| ACH in living areas with heating off, mean ( $\pm$ SD) <sup>†</sup>                                              | 0.73 ( $\pm$ 0.18)                   | 0.64 ( $\pm$ 0.22)                                 |
| ACH in living areas with heating on, mean ( $\pm$ SD) <sup>†</sup>                                               | 1.60 ( $\pm$ 0.12)                   | 1.68 ( $\pm$ 0.30)                                 |
| Volume of bedrooms m <sup>3</sup> , mean ( $\pm$ SD) <sup>†</sup>                                                | 29.9 ( $\pm$ 4.8)                    | 28.2 ( $\pm$ 4.0)                                  |
| Volume of living areas m <sup>3</sup> , mean ( $\pm$ SD) <sup>†</sup>                                            | 70.9 ( $\pm$ 9.8)                    | 66.1 ( $\pm$ 7.9)                                  |
| <i>Information on occupancy and TB Status of occupants-determined from cohort of 695 villagers</i> <sup>††</sup> |                                      |                                                    |
| Number of persons per dwelling, mean ( $\pm$ SD)                                                                 | 5.3( $\pm$ 3.0)                      | 5.0 ( $\pm$ 2.8)                                   |
| Occupants per room, mean ( $\pm$ SD)                                                                             | 0.9( $\pm$ 0.5)                      | 1.0 ( $\pm$ 0.5)                                   |
| Dwelling where at least 1 occupant had TB disease, N(%)                                                          | 6 (33.3%)                            | 41 (23.0%)                                         |
| at least 1 occupant with smear-positive TB, N(%)                                                                 | 1 (5.6%)                             | 10 (5.9%)                                          |

ACH, air changes per hour; SD, standard deviation

Occupant defined as person residing in the dwelling; Visitor defined as someone who visits the dwelling at least once weekly but does not reside there.

<sup>†</sup> Denominators exclude 7 dwellings that were not used for social activities for which information on housing characteristics could not be determined.

<sup>††</sup> Data on number of persons per dwelling missing for 2 dwellings used for social activities. Data on number of rooms in the dwelling missing for 19 dwellings that were not used for social activities.

## Methods Supplement

### Section 1. Questionnaire data

Administered questionnaires assessed nutrition, housing, socio-economic and lifestyle factors.[1] Parents provided responses for children under the age of 12.

- *Smoking status*: was assigned based on responses on a self-administered questionnaire completed only by adult participants, and serum cotinine [2,3] which was measured in all (children and adults).

- *Annual personal income*: participants were asked to classify their annual personal income into one of three categories: less than \$20,000; \$20,000-40,000; or greater than \$40,000. For participants under the age of 18, the annual personal income of the parent or guardian was used.

- *Identification of dwellings used for social activities*: The addresses of these houses were provided to the research team by community members and clinic staff. All other dwellings were classified as “not used for social activities”.

- *Visiting of dwelling*: In one section, participants were asked to list three dwellings they visited at least once weekly; this information was used to determine if they had visited one of the dwellings used for social activities, at least one weekly.

- *Identification of dwellings where visitors could have been exposed to someone with active TB*: We used two methods to identify dwellings where study participants could have been exposed to someone with active TB. From the questionnaires completed by

1  
2  
3 participants with confirmed or probable active TB, we determined which dwellings they  
4 visited at least weekly. From data collected as part of medical and public health  
5 investigations, we identified the addresses of where all persons diagnosed with  
6 confirmed or probable TB had lived between November 2011 and November 2012.  
7  
8  
9  
10  
11  
12  
13

## 14 **Section 2. Housing & ventilation assessment**

15  
16  
17

18 Data on the year of construction, heating method, dwelling type, and layout were provided by  
19 the two municipal/regional institutions which owned these dwellings. Room dimensions were  
20 measured by study personnel and verified using floor plans provided by the housing bureau.  
21  
22  
23  
24  
25

26 “Ventilation” is defined as the exchange of indoor air for outdoor air per unit of time. In the  
27 community where the study was undertaken, nearly all dwellings are heated using “forced air”  
28 (also called “pulsed air”) heating systems — when the heating system is on and the  
29 temperature is lower than the thermostat setting, outdoor air is heated and delivered indoors;  
30 as a result, ventilation is higher compared to when the heating is off. (The exceptions to use of  
31 forced air systems are apartments, which are heated using radiators.) Because of this, we  
32 measured ventilation with heating off and with heating on. Measurements were taken in at  
33 least one bedroom (where the participant slept) and in the common living area (this was the  
34 living room and the kitchen in all houses visited).  
35  
36  
37  
38  
39  
40  
41  
42  
43  
44  
45  
46  
47  
48

49 To measure ventilation, all windows and doors were closed – including doors leading to all  
50 indoor rooms and doors leading to the outside. Pure CO<sub>2</sub> was used as a tracer gas [5,6] and  
51 released at a high rate to achieve a peak of 1500ppm above baseline (corresponding, on  
52  
53  
54  
55  
56  
57  
58  
59  
60

1  
2  
3 average, to a release time of 6 seconds/m<sup>2</sup> in bedrooms, and 9 seconds/m<sup>2</sup> in living areas). Two  
4  
5 motorized fans were used throughout the release and measurement to ensure mixing of CO<sub>2</sub>  
6  
7 throughout the entire room. CO<sub>2</sub> was measured continuously with a portable device with  
8  
9 electro-chemical detectors (Q-Trak Plus, TSI) which logged the concentration every minute.  
10  
11 Recordings were taken for a total of 20 minutes. During the recording, study staff noted if any  
12  
13 doors or windows were opened, the number of people present, and the number of people  
14  
15 entering or leaving.  
16  
17  
18  
19

20  
21 Because CO<sub>2</sub> concentration falls at an exponential rate, the following equation is used to  
22  
23 calculate ventilation based on the changes in CO<sub>2</sub> concentration over time ("Standard Test  
24  
25 Method for Determining Air Change in a Single Zone by Means of a Tracer Gas Dilution," ASTM  
26  
27 E741-11):  
28  
29  
30

$$\ln[CO_2]_i(t) = [CO_2]_0 - \beta * t_i$$

31  
32 where  $[CO_2]_i(t)$  is the concentration at time  $i$ ,  $[CO_2]_0$  is the CO<sub>2</sub> concentration at time zero,  
33  
34 and  $\beta$  is air changes per hour (ACH), which is the number of times in one hour that the total  
35  
36 volume of air in a room is replaced by air from outside the room.  
37  
38  
39  
40  
41  
42  
43  
44

45 The above relationship is applicable if CO<sub>2</sub> concentration has reached equilibrium throughout  
46  
47 the room. We took several precautions to ensure that CO<sub>2</sub> measurements were at equilibrium  
48  
49 when calculating ventilation. First, as mentioned earlier, two fans were running during CO<sub>2</sub>  
50  
51 release and measurement to ensure mixing of air. Second, CO<sub>2</sub> recordings during the first three  
52  
53 minutes of measurement were discarded. Third, we also discarded CO<sub>2</sub> measurements that  
54  
55  
56  
57  
58  
59  
60

1  
2  
3 were outliers and unduly influencing the ACH; this was done using simple linear regression  
4  
5 (with  $\ln[\text{CO}_2]$  as the dependent variable, and time as the independent variable) to identify  
6  
7 observations with Cook's distance greater than  $4/n$  (where  $n$  is the number of  $\text{CO}_2$   
8  
9 measurements) [7].  
10

11  
12  
13 Dwellings in this community are grouped into five main types, each of which has between one  
14  
15 and 3 sub-types. Dwellings of the same type share similar construction characteristics and  
16  
17 layouts; sub-types differ in size and room number. We prioritized taking ventilation  
18  
19 measurements in dwellings where persons with active TB had lived and dwellings of the same  
20  
21 type as the gathering houses. When ten measurements had been performed in the most  
22  
23 common sub-types, we performed an interim analysis of ventilation data to decide whether we  
24  
25 had enough measurements for each sub-type. This was based on an analysis of the variance  
26  
27 between and within buildings- when the variance of ventilation measurements between  
28  
29 different buildings of the same sub-type was less than the variance of repeated measurements  
30  
31 within the same building, we concluded we did not need further measures in buildings of that  
32  
33 type. For all subsequent participants who lived in buildings of that type, they were assigned  
34  
35 model-specific average ventilation measures (average values of all ventilation measurements  
36  
37 from all buildings of that type). If ventilation was measured in the dwelling of a participant,  
38  
39 these directly measured values were assigned to that participant.  
40  
41  
42  
43  
44  
45  
46  
47  
48  
49

50 Air change rates were estimated by analyzing the  $\text{CO}_2$  recordings using multi-level multivariable  
51  
52 regression, with  $\ln[\text{CO}_2]$  as the dependent variable and time as the independent variable whose  
53  
54 estimated slope is the ACH. These models included interaction terms to account for the effects  
55  
56  
57  
58  
59  
60



1  
2  
3 on ventilation of the room (living area vs bedrooms) and heating condition (on vs off), as well as  
4  
5 a random-effect for the ACH between dwellings. This approach had several advantages. First, it  
6  
7 ensured that dwelling-specific ACH estimates accounted for the variance of the ACH  
8  
9 measurement in each dwelling. Second, all recordings from dwellings of the same type were  
10  
11 used to estimate a weighted average ACH for each type. Third, multi-level regression allowed us  
12  
13 to adjust for the number of persons who were present during the recording- this was important  
14  
15 because people are sources of CO<sub>2</sub>, and the presence of a continuous source of CO<sub>2</sub> release  
16  
17 during the recording would slow the rate of decline in CO<sub>2</sub> concentration, and if not controlled  
18  
19 for, would lead to underestimation of ventilation.  
20  
21  
22  
23  
24

25  
26  
27 Four ACH estimates were calculated for each dwelling: with heating off in living areas, with  
28  
29 heating on in living areas, with heating off in bedrooms, and with heating on in bedrooms.  
30

31  
32 These ACHs were calculated as the sum of: the weighted average ACH of dwellings of the same  
33  
34 type and the applicable interaction terms for the effects of the room and heating status (also  
35  
36 for dwellings of the same type). For dwellings where ACH was directly measured, we also added  
37  
38 the dwelling's random effect estimate.  
39  
40  
41  
42

### 43 **Section 3. Details on statistical methods**

44  
45  
46 *a. Analysis of ventilation as a risk factor for TB infection and disease:* We analyzed the  
47  
48 ventilation level in the common living area of participants' dwellings — since all household  
49  
50 occupants shared these areas, and many occupants slept in these areas. The maximal  
51  
52 ventilation (with heating on) and the minimal ventilation (with heating off) were analyzed  
53  
54 separately.  
55  
56  
57  
58  
59  
60

1  
2  
3  
4 *b. Multivariable modeling:* For adjusted analyses we used the method of generalized estimating  
5  
6 equations for logistic regression, with clustering at the dwelling level. For each objective, we  
7  
8 first calculated univariable odds ratios (OR) for: (1) characteristics of the participant's dwelling  
9  
10 (method of heating, occupancy, ACH, and room volume of the living area); (2) variables related  
11  
12 to potential exposures to persons with TB (at least weekly visiting a dwelling that was used for  
13  
14 social activities [yes vs. no], and having lived with someone who had smear-positive TB [yes vs.  
15  
16 no]); and, (3) characteristics we considered well-established determinants of TB (age, gender,  
17  
18 cigarette smoking, and socioeconomic status). In our preliminary multivariable model, we  
19  
20 included all variables associated in univariable analysis with a p-value <0.5. Using a step-wise  
21  
22 approach we excluded variables if their removal improved the multivariable model's fit as  
23  
24 indicated by a lower quasi-likelihood information criterion (QICu) [8]. This approach was taken  
25  
26 in order to minimize over-specification given our limited sample size. For the first objective, we  
27  
28 hypothesized that occupancy would only be associated with risk of infection in dwellings  
29  
30 inhabited by smear-positive persons, and assessed this in univariable analysis using  
31  
32 stratification, and in multivariable analysis by including an interaction term. Interactions were  
33  
34 considered significant if their associated p-values were <0.05. For disease, the interaction term  
35  
36 was kept in our final model despite an increase QICu because it was statistically significant, and  
37  
38 for consistency with our model for infection. We considered associations to be significant if the  
39  
40 95% confidence interval (95% CI) of the odds ratios excluded 1.0.  
41  
42  
43  
44  
45  
46  
47  
48  
49  
50

#### 51 52 53 54 55 **References Methods Supplement** 56 57 58 59 60

- 1  
2  
3 1. Fox GJ, Lee RS, Lucas M, Ahmad Khan F, Proulx JF, Hornby K, et al. Inadequate Diet is  
4  
5 Associated with Acquiring Mycobacterium tuberculosis Infection in an Inuit Community: A Case-  
6  
7 Control Study. *Ann Am Thorac Soc*. 2015.  
8  
9
- 10  
11 2. Benowitz NL, Bernert JT, Caraballo RS, Holiday DB, Wang J. Optimal serum cotinine  
12  
13 levels for distinguishing cigarette smokers and nonsmokers within different racial/ethnic groups  
14  
15 in the United States between 1999 and 2004. *Am J Epidemiol*. 2009; **169**(2): 236-48.  
16  
17
- 18  
19 3. Available from: [http://www.salimetrics.com/assets/documents/Spit\\_Tips\\_-](http://www.salimetrics.com/assets/documents/Spit_Tips_-_Cotinine_Guidelines.pdf)  
20  
21 [\\_Cotinine\\_Guidelines.pdf](http://www.salimetrics.com/assets/documents/Spit_Tips_-_Cotinine_Guidelines.pdf) Accessed June 6, 2014  
22  
23
- 24  
25 4. Statistics Canada. December 2012. Available from:  
26  
27 <http://www.statcan.gc.ca/concepts/definitions/dwelling-logement01-eng.htm> Accessed July 9,  
28  
29 2014  
30
- 31  
32 5. Menzies R, Schwartzman K, Loo V, Pasztor J. Measuring ventilation of patient care areas  
33  
34 in hospitals. Description of a new protocol. *Am J Respir Crit Care Med*. 1995; **152**(6 Pt 1): 1992-9.  
35
- 36  
37 6. Persily AK. Evaluating building IAQ and ventilation with indoor carbon dioxide.  
38  
39 Transactions-American Society Of Heating Refrigerating And Air Conditioning Engineers. 1997;  
40  
41 **103**: 193-204.  
42
- 43  
44 7. Rawlings JO, Pantula SG, Dickey DA. Applied regression analysis a research tool.  
45  
46 Springer texts in statistics. 2nd ed. New York: Springer; 1998.  
47
- 48  
49 8. Hardin JW, Hilbe JM. Generalized estimating equations. Boca Raton, Fla.: Chapman &  
50  
51 Hall/CRC; 2003.  
52  
53  
54  
55  
56  
57  
58  
59  
60
